# Supplementary material
Source: Springer Nature journal article supplement (https://www.springermedizin.de/resource/supplementary/13054_2011_502_MOESM1_ESM.pdf/9708526)
Supplement: MOESM1 [file 9708526]

*Sepsi d'Oc* study  
445 patients  
Observational period: 230 patients  
Interventional period: 215 patients

57 excluded patients (Prior renal failure,  
death in the first 24 hours)

The present study  
388 patients analyzed for factors associated with RRT  
354 patients analyzed for factors associated with renal dysfunction

**90 patients  
with RRT**

**298 patients  
without RRT**

> 50% increase  
in serum  
creatinine  
27 patients

≤ 50% increase in  
serum creatinine  
237 patients

34 (8.8%) excluded patients:  
patients with no RRT and  
without data concerning the  
course of serum creatinine in  
the first in the first 24 hours

**117 patients with  
renal dysfunction**

**237 patients with no  
renal dysfunction**
